# Supplementary material
Source: Elsevier journal article supplement (https://www.sciencedirect.com/science/article/pii/S1473309922002195)
Supplement: mmc1 [file 1-s2.0-S1473309922002195-mmc1.pdf]

Hypothesis annotation for ars.els-cdn.com


Loading annotation for ars.els-cdn.com
